# Supplementary material
Source: HighWire-hosted journal article supplement (https://bmjopen.bmj.com/content/15/1/e092006)
Supplement: inline-supplementary-material-1 [file inline-supplementary-material-1.pdf]

The search strategy in PubMed, Embase, Web of Science, and Cochrane Library database

| Database         | Search strategy                                                                                                                                                                                                                                                                                                                        |
|------------------|----------------------------------------------------------------------------------------------------------------------------------------------------------------------------------------------------------------------------------------------------------------------------------------------------------------------------------------|
| Pubmed           | (( <span>"Endometrial Neoplasms"</span> [MeSH] OR <span>"endometrial cancer"</span> OR <span>"endometrial carcinoma"</span> OR <span>"uterine cancer"</span> ) AND ( <span>"MELF pattern"</span> OR <span>"microcystic elongated and fragmented pattern"</span> OR <span>"MELF invasion"</span> OR <span>"MELF infiltration"</span> )) |
| Embase           | ( <span>'endometrial cancer'/exp</span> OR <span>'endometrial carcinoma'</span> OR <span>'uterine cancer'</span> OR <span>'endometrium tumor'</span> ) AND ( <span>'melf pattern'</span> OR <span>'melf invasion'</span> OR <span>'microcystic elongated and fragmented pattern'</span> OR <span>'melf infiltration'</span> )          |
| Web of Science   | TS=( <span>"endometrial cancer"</span> OR <span>"endometrial carcinoma"</span> OR <span>"uterine cancer"</span> OR <span>"endometrial neoplasm"</span> ) AND TS=( <span>"MELF pattern"</span> OR <span>"microcystic elongated and fragmented pattern"</span> OR <span>"MELF invasion"</span> OR <span>"MELF infiltration"</span> )     |
| Cochrane Library | ( <span>"endometrial cancer"</span> OR <span>"endometrial carcinoma"</span> OR <span>"uterine cancer"</span> OR <span>"endometrial neoplasm"</span> ) AND ( <span>"MELF pattern"</span> OR <span>"microcystic elongated and fragmented pattern"</span> OR <span>"MELF invasion"</span> OR <span>"MELF infiltration"</span> )           |
